# Supplementary material
Source: PubMed Central journal article supplement (PMC7289563)
Supplement: mmc1.pdf [file mmc1.pdf]

# THE LANCET Oncology

## Supplementary appendix

This appendix formed part of the original submission and has been peer reviewed. We post it as supplied by the authors.

Supplement to: Mehanna H, Hardman JC, Shenson JA, et al. Recommendations for head and neck surgical oncology practice in a setting of acute severe resource constraint during the COVID-19 pandemic: an international consensus. *Lancet Oncol* 2020; published online June 11. [http://dx.doi.org/10.1016/S1470-2045\(20\)30334-X](http://dx.doi.org/10.1016/S1470-2045(20)30334-X).

**Appendix A: The participating national and international bodies and their representatives****HNCIG | Head & Neck Cancer Surgery During COVID-19**

| <b>Group or Society</b>                                                                                     | <b>Name of representative</b>                     |
|-------------------------------------------------------------------------------------------------------------|---------------------------------------------------|
| African Head and Neck Society (AfHNS)                                                                       | Johannes J. Fagan<br>Anna Konney                  |
| American Society for Radiation Oncology (ASTRO)                                                             | Sue S. Yom                                        |
| American Society of Clinical Oncology (ASCO)                                                                | Ravindra Uppaluri                                 |
| Australian and New Zealand Head and Neck Cancer Society (ANZHNS)                                            | Benedict J. Panizza                               |
| British Association of Head & Neck Oncologists (BAHNO)                                                      | Cyrus Kerawala                                    |
| Canadian Cancer Trials Group (CCTG)                                                                         | Anthony C. Nichols                                |
| Cancer Trials Ireland (CTI)                                                                                 | Paul Lennon                                       |
| Danish Head and Neck Cancer Group (DAHANCA)                                                                 | Christian Godballe                                |
| Dutch Head and Neck Society (NWHHT)                                                                         | Robert P. Takes                                   |
| Eastern Cooperative Oncology Group and The American College of Radiology Imaging Network (ECOG-ACRIN)       | Mihir R. Patel                                    |
| European Head and Neck Society (EHNS)                                                                       | Wojciech Golusiński                               |
| European Organisation for Research and Treatment of Cancer (EORTC)                                          | Christian Simon<br>Lisa Licitra                   |
| European Society for Radiotherapy and Oncology (ESTRO)                                                      | David J. Thomson                                  |
| French Head and Neck Cancer Group (GORTEC)                                                                  | Haitham Mirghani                                  |
| Fudan University Shanghai Cancer Center (FUSCC)                                                             | Yu Wang                                           |
| German Interdisciplinary Working Group for Head and Neck Tumors (IAG-KHT)                                   | Andreas Dietz                                     |
| Head and Neck Cancer Society of Turkey (HNSCT)                                                              | Sefik Hosal                                       |
| Head and Neck Cancer Study Group of the Japan Clinical Oncology Group (JCOG-HNCSG)                          | Akihiro Homma                                     |
| Hellenic Cooperative Oncology Group (HeCOG)                                                                 | Efthymios Kyrodimos                               |
| Hong Kong Nasopharyngeal Carcinoma Study Group (HKNPCSG) AND The Hong Kong Head and Neck Society (HKHNS)    | Velda Ling Yu Chow                                |
| International Association of Oral Oncology (IAOO)                                                           | Moni A. Kuriakose                                 |
| International Committee of the American Head and Neck Society (AHNS)                                        | Jason Y K Chan<br>C. René Leemans<br>Dennis Kraus |
| International Federation of Head and Neck Oncological Societies (IFHNOS) AND Tata Medical Center            | Pankaj Chaturvedi                                 |
| Korean Society of Head and Neck Surgery (KSHNS)                                                             | Yoon Woo Koh                                      |
| Latin American Clinical Oncology Group (LACOG)                                                              | Alvaro Sanabria<br>Luiz P. Kowalski               |
| National Cancer Center/Chinese Academy of Medical Sciences and Peking Union Medical College Cancer Hospital | Yi-ming Zhu                                       |
| National Cancer Centre Singapore (NCCS) AND Head and Neck Cancer Society, Singapore (HNCS)                  | N. Gopalakrishna Iyer                             |
| National Cancer Research Institute-UK (NCRI)                                                                | Vinidh Paleri                                     |
| North West Italian Oncology Group (GONO)                                                                    | Cesare Piazza<br>Lisa Licitra                     |
| NRG Oncology- Head and Neck Cancer Committee                                                                | Stephen Y. Lai                                    |
| Spanish Head and Neck Cancer Cooperative Group (FETTCC)                                                     | Pablo Parente Arias                               |
| Taiwan Cooperative Oncology Group (TCOG) AND Taiwan Head and Neck Society (THNS)                            | Pei-Jen Lou                                       |
| Trans-Tasman Radiation Oncology Group (TROG)                                                                | Bernard Lyons<br>Danny Rischin                    |
| United Arab Emirates Otorhinolaryngological and Head and Neck Society                                       | Mohammad AlFalasi                                 |

**Appendix B: Summary of the questions and results of all three rounds of the Delphi process for management of HNC during the COVID-19 pandemic.**

## HNCIG | Head & Neck Cancer Surgery During COVID-19

| QUESTIONS COLOR KEY                                             | RESULTS COLOR KEY                        |
|-----------------------------------------------------------------|------------------------------------------|
| Item dropped after Round 1                                      | ≥80% response (Strong agreement)         |
| Item dropped after Round 2                                      | 67–80% response (Agreement)              |
| Item reached agreement after Round 3                            | 20–66% response (No Agreement)           |
| No agreement reached OR Question clarified in subsequent rounds | ≤20% response (Strong agreement against) |

### PART 1

## Clinic protocols in the context of increased SARS-CoV-2 virus prevalence

|                                                                                                                                                                                                              | 1st round | 2nd round | 3rd round |
|--------------------------------------------------------------------------------------------------------------------------------------------------------------------------------------------------------------|-----------|-----------|-----------|
| <b>Considering the prevalence of SARS-CoV-2 in the community..</b>                                                                                                                                           |           |           |           |
| <b>Q1. Would you perform flexible nasoendoscopy in clinic:</b>                                                                                                                                               |           |           |           |
| a. In an asymptomatic patient with previous head and neck cancer, attending clinic for routine head and neck cancer follow up: <b>(Choose one)</b>                                                           |           |           |           |
| -FNE is appropriate only if using adequate personal protective equipment (PPE)                                                                                                                               | 25.0%     | 40.0%     | 40.0%     |
| -FNE is not appropriate in these patients                                                                                                                                                                    | 72.5%     | 60.0%     | 60.0%     |
| -FNE is appropriate even without adequate PPE                                                                                                                                                                | 2.5%      | 0.0%      |           |
| b. In a patient with symptoms or exam findings suggestive of new primary cancer or recurrence: <b>(Choose one)</b>                                                                                           |           |           |           |
| -FNE is appropriate even without adequate PPE                                                                                                                                                                | 10.0%     | 0.0%      |           |
| -FNE is appropriate only if using adequate PPE                                                                                                                                                               | 85.0%     | 92.5%     |           |
| -FNE is not appropriate in these patients                                                                                                                                                                    | 5.0%      | 7.5%      |           |
| c. In a patient with no history of head and neck cancer and low risk symptoms (eg, globus): <b>(Choose one)</b>                                                                                              |           |           |           |
| -FNE is appropriate only if using adequate PPE                                                                                                                                                               |           | 27.5%     | 20.0%     |
| -FNE is not appropriate in these patients                                                                                                                                                                    |           | 72.5%     | 80.0%     |
| -FNE is appropriate even without adequate PPE                                                                                                                                                                |           | 0.0%      |           |
| d. In a patient with concern for critical airway obstruction: <b>(Choose one)</b>                                                                                                                            |           |           |           |
| -FNE is appropriate even without adequate PPE                                                                                                                                                                | 17.5%     | 2.5%      |           |
| -FNE is appropriate only if using adequate PPE                                                                                                                                                               | 77.5%     | 97.5%     |           |
| -FNE is not appropriate in these patients                                                                                                                                                                    | 5.0%      | 0.0%      |           |
| <b>Q2. Which of the following would you use to confirm a diagnosis of cancer..</b>                                                                                                                           |           |           |           |
| -Panendoscopy of primary tumour under general anesthesia and biopsy?                                                                                                                                         | 55.0%     | 45.0%     |           |
| -Biopsy of primary tumour under local anesthesia or general anesthesia without panendoscopy?                                                                                                                 | 62.5%     | 37.5%     |           |
| -Fine needle aspiration or core biopsy of suspicious lymph node + suspicious findings on imaging?                                                                                                            | 92.5%     | 7.5%      |           |
| -Highly suspicious findings on CT or MRI only without biopsy ?                                                                                                                                               | 20.0%     | 80.0%     |           |
| -Highly suspicious findings on PET/CT only without biopsy?                                                                                                                                                   | 17.5%     | 82.5%     |           |
| <b>Q3. Considering the prevalence of SARS-CoV-2 in the community..</b>                                                                                                                                       |           |           |           |
| -A full panendoscopy should be performed at the time of biopsy of the primary tumour?                                                                                                                        |           | 35.0%     | 65.0%     |
| -If the primary tumour can be biopsied under local anaesthetic, a full panendoscopy (including laryngoscopy, hypopharyngoscopy and upper oesophagoscopy) under general anaesthetic should still be arranged? |           | 15.0%     | 85.0%     |
| -If the primary tumour requires a general anaesthetic for biopsy, then a full panendoscopy should still be performed at the same time?                                                                       |           | 67.5%     | 32.5%     |
| <b>Q4. Surveillance practice for routine head and neck cancer patients, 3 months or more after surgery.</b>                                                                                                  |           |           |           |
| <b>Which of the following are acceptable methods of follow-up for these patients?</b>                                                                                                                        |           |           |           |
| a. How would you perform the follow-up for these patients?                                                                                                                                                   |           |           |           |
| -Video or phone consultation only                                                                                                                                                                            | 25.0%     | 25.0%     | 75.0%     |
| -Combination of face to face and video/phone consultations                                                                                                                                                   | 57.5%     | 75.0%     | 25.0%     |
| -Video or phone consultation, with face to face review only if suspicious findings                                                                                                                           | -         | 80.0%     | 20.0%     |
| -Face to face follow-up                                                                                                                                                                                      | 17.5%     | 47.5%     | 52.5%     |
| -No follow-up                                                                                                                                                                                                | 0.0%      | 70.0%     | 30.0%     |
| b. How frequently would you perform the follow-up?                                                                                                                                                           |           |           |           |
| -Normal frequency of follow-up                                                                                                                                                                               | 55.0%     | 62.5%     | 67.5%     |
| -Reduced frequency of follow-up                                                                                                                                                                              | 45.0%     | 37.5%     | 32.5%     |

|                                   |      |
|-----------------------------------|------|
| -Increased frequency of follow-up | 0.0% |
|-----------------------------------|------|

**Q5. What minimum criteria do you use to identify ACTIVE SARS-CoV-2 infection before surgery?**

|                                                                            | %     |
|----------------------------------------------------------------------------|-------|
| -Positive clinical history (including symptoms) alone                      | 7.5%  |
| -Positive clinical history & positive imaging together                     | 5.0%  |
| -Positive lab test alone                                                   | 15.0% |
| -Positive clinical history & positive lab test together                    | 27.5% |
| -Positive clinical history & positive lab test & positive imaging together | 10.0% |
| -Any one positive finding (clinical history, lab test, or chest imaging)   | 32.5% |
| -Positive lab test & positive imaging                                      | 2.5%  |
| -Positive chest imaging only (eg, CT)                                      | 0.0%  |
| -We don't consider COVID-19 status before surgery                          | 0.0%  |

| Yes   |       | No    |       |
|-------|-------|-------|-------|
| 40.0% | 60.0% | 30.0% | 70.0% |
| 52.5% | 47.5% | 57.5% | 42.5% |
| 80.0% | 20.0% |       |       |
| 72.5% | 27.5% |       |       |
| 52.5% | 47.5% |       |       |

**Q6. What delay to the timing of the operation would you consider in a patient who is COVID+ or highly suspected of COVID+ and who does not have indications for emergency intervention (eg, no impending airway obstruction)? (Choose one)**

|                                                                           | %     |
|---------------------------------------------------------------------------|-------|
| -When COVID-19 negative on repeat testing                                 | 12.5% |
| -When symptoms resolve regardless of whether a repeat test is done or not | -     |
| -When both symptoms resolve and COVID-19 negative on repeat testing       | 67.5% |
| -No delay in surgery                                                      | 0.0%  |
| -Delay until symptoms resolve                                             | 5.0%  |
| -Delay by 4 weeks                                                         | 10.0% |
| -Delay by 8 weeks                                                         | 2.5%  |
| -Delay for longer than 8 weeks                                            | 2.5%  |

| %     |
|-------|
| 5.0%  |
| 0.0%  |
| 95.0% |

**PART 2**

**Treatment protocols in the context of increased SARS-CoV-2 virus prevalence**

|                                                                                                                               | 1st round | 2nd round | 3rd round |       |
|-------------------------------------------------------------------------------------------------------------------------------|-----------|-----------|-----------|-------|
| <b>Q1. In the case of an early T1/2 N0 oral cancer:</b>                                                                       |           |           |           |       |
| a. Acceptable delay to operate:                                                                                               |           |           |           |       |
| -It is not acceptable to delay surgery - operate within 4 weeks from diagnosis                                                | 50.0%     | 47.5%     | 52.5%     |       |
| -It is acceptable to delay surgery for up to 8 weeks from diagnosis                                                           | 45.0%     | 55.0%     | 45.0%     |       |
| -It is not acceptable to delay treatment – initiate alternative treatment (eg, RT) immediately, instead of surgery            | -         | 20.0%     | 80.0%     |       |
| -It is acceptable to delay surgery for up to 12 weeks from diagnosis                                                          | 5.0%      |           |           |       |
| b. If surgery is <b>NOT ANTICIPATED</b> to occur within the acceptable time frame above, you would:                           |           |           |           |       |
| -Initiate alternative treatment (eg, RT) immediately?                                                                         | 40.0%     | 60.0%     | 32.5%     | 67.5% |
| -Undertake serial monitoring, and only consider surgery or alternative therapies urgently if tumour progresses?               | 60.0%     | 40.0%     | 77.5%     | 22.5% |
| -Consider palliative treatment as only treatment?                                                                             | 0.0%      | 100.0%    |           |       |
| c. If a delay to surgery of <b>4-8 weeks</b> is anticipated, you would:                                                       |           |           |           |       |
| -Treat with primary RT immediately, instead of surgery?                                                                       |           |           | 17.5%     | 82.5% |
| -Undertake serial monitoring, and only consider surgery or alternative therapies urgently if tumour progresses significantly? |           |           | 87.5%     | 12.5% |
| d. If a delay to surgery of <b>more than 8 weeks</b> is anticipated, you would:                                               |           |           |           |       |
| -Treat with primary RT immediately, instead of surgery?                                                                       |           |           | 45.0%     | 55.0% |
| -Undertake serial monitoring, and only consider surgery or alternative therapies urgently if tumour progresses significantly? |           |           | 67.5%     | 32.5% |
| <b>Q2. In the case of an early T1N0 laryngeal cancer:</b>                                                                     |           |           |           |       |
| a. Acceptable delay to operate:                                                                                               |           |           |           |       |
| -It is not acceptable to delay treatment – initiate alternative treatment (eg, RT) immediately, instead of surgery            | 52.5%     | 70.0%     | 30.0%     |       |
| -It is not acceptable to delay surgery - operate within 4 weeks from diagnosis                                                | 17.5%     | 27.5%     | 72.5%     |       |
| -It is acceptable to delay surgery for up to 8 weeks from diagnosis                                                           | 22.5%     | 47.5%     | 52.5%     |       |
| -It is acceptable to delay surgery for up to 12 weeks from diagnosis                                                          | 7.5%      |           |           |       |
| b. If surgery is <b>NOT ANTICIPATED</b> to occur within the acceptable time frame above, you would:                           |           |           |           |       |
| -Initiate alternative treatment (eg, RT) immediately?                                                                         | 68.2%     | 31.8%     | 100.0%    | 0.0%  |
| -Undertake serial monitoring, and only consider surgery or alternative therapies urgently if tumour progresses?               | 31.8%     | 68.2%     | 25.0%     | 75.0% |
| -Consider palliative treatment as only treatment?                                                                             | 0.0%      | 100.0%    |           |       |
| c. If a delay to surgery of <b>4-8 weeks</b> is anticipated, would you treat with primary RT immediately, instead of surgery? |           |           |           |       |
|                                                                                                                               |           |           | 67.5%     | 32.5% |
|                                                                                                                               |           |           | Yes       | No    |

d. If a delay to surgery of **more than 8 weeks** is anticipated, would you treat with primary RT immediately, instead of surgery?

|       |      |
|-------|------|
| 92.5% | 7.5% |
|-------|------|

**Q3. In the case of advanced head and neck cancer which will require prolonged operative time, prolonged hospital stay, and/or intensive care (eg, T4 N1 laryngeal cancer, T3N2b oral cancer, or a case requiring bone resection such as maxillectomy):**

a. Acceptable delay to operate:

|                                                                                | %     | %     |
|--------------------------------------------------------------------------------|-------|-------|
| -It is not acceptable to delay surgery - operate within 4 weeks from diagnosis | 77.5% | 87.5% |
| -It is acceptable to delay surgery for up to 8 weeks from diagnosis            | 17.5% | 12.5% |
| -It is acceptable to delay surgery for up to 12 weeks from diagnosis           | 5.0%  |       |

b. If surgery is **NOT ANTICIPATED** to occur within the acceptable time frame above, you would:

|                                                                                                                 | Yes   | No    | Yes   | No    |
|-----------------------------------------------------------------------------------------------------------------|-------|-------|-------|-------|
| -Initiate alternative treatment (eg, RT/CRT) immediately?                                                       | 53.4% | 46.6% | 90.0% | 10.0% |
| -Give induction (metronomic) chemotherapy until surgery is possible?                                            | 29.3% | 70.7% | 50.0% | 50.0% |
| -Undertake serial monitoring, and only consider surgery or alternative therapies urgently if tumour progresses? | 13.8% | 86.2% |       |       |
| -Consider palliative treatment as only treatment?                                                               | 3.4%  | 96.6% |       |       |

c. If a delay to surgery of **4-8 weeks** is anticipated, you would:

|                                                                      | Yes   | No    |
|----------------------------------------------------------------------|-------|-------|
| -Treat with primary RT/CRT instead of surgery?                       | 62.5% | 37.5% |
| -Give induction (metronomic) chemotherapy until surgery is possible? | 52.5% | 47.5% |

d. If a delay to surgery of **more than 8 weeks** is anticipated, you would:

|                                                                      | Yes   | No    |
|----------------------------------------------------------------------|-------|-------|
| -Treat with primary RT/CRT instead of surgery?                       | 82.5% | 17.5% |
| -Give induction (metronomic) chemotherapy until surgery is possible? | 45.0% | 55.0% |

**Q4. In the case of differentiated thyroid cancer (T1-3, N0-1b) with no adverse features (no extension into strap muscles, trachea, or oesophageal musculature, no critical airway compression, and no imminent risk to, or involvement of, the recurrent laryngeal nerve):**

a. Acceptable delay to operate:

|                                                                                       | %     | Yes   | No    |
|---------------------------------------------------------------------------------------|-------|-------|-------|
| -It is acceptable to delay surgery for up to 12 weeks from diagnosis                  | 42.5% | 82.5% | 17.5% |
| -It is acceptable to delay surgery for up to 18 weeks from diagnosis                  | 15.0% | 30.0% | 70.0% |
| -It is acceptable to delay surgery for up to 24 weeks from diagnosis                  | 22.5% | 22.5% | 77.5% |
| -It is acceptable to delay surgery indefinitely (serial monitoring until progression) | 20.0% | 22.5% | 77.5% |

b. If surgery is **NOT ANTICIPATED** to occur within the acceptable time frame above, you would:

|                                                                               | Yes   | No     |
|-------------------------------------------------------------------------------|-------|--------|
| -Consider alternative treatment (eg radioiodine/RT) immediately?              | 3.2%  | 96.8%  |
| -Consider palliative treatment as only treatment?                             | 0.0%  | 100.0% |
| -Undertake serial monitoring, and only consider surgery if tumour progresses? | 96.8% | 3.2%   |

**Q5. In the case of T1-2 differentiated thyroid cancer <4cm, which of the following features should be considered as indication to operate within 4 weeks?**

|                                                             | Yes   | No    | Yes   | No    | Yes   | No    |
|-------------------------------------------------------------|-------|-------|-------|-------|-------|-------|
| -Gross extrathyroidal extension invading only strap muscles | 32.5% | 67.5% | 37.5% | 62.5% | 15.0% | 85.0% |
| -Posterior nodule in the tracheoesophageal groove           | 42.5% | 57.5% | 60.0% | 40.0% | 60.0% | 40.0% |
| -Nodules directly abutting the airway, but not invading it  | 65.0% | 35.0% | 75.0% | 25.0% | 82.5% | 17.5% |
| -Regional lymph nodal metastases                            | 27.5% | 72.5% | 27.5% | 72.5% | 7.5%  | 92.5% |

**Q6. There are some procedures that result in higher risk of complications or prolonged hospital stay. These questions below try to strike a balance between maintaining standard of care versus delays or alterations in treatment. Thus, in these scenarios, would you consider the following:**

|                                                                                                                                                                                                                     | Yes   | No    | Yes   | No    | Yes   | No    |
|---------------------------------------------------------------------------------------------------------------------------------------------------------------------------------------------------------------------|-------|-------|-------|-------|-------|-------|
| -Accept a <b>REDUCED</b> level of post operative monitoring (eg, no intensive care bed or step down unit) than you would usually use for such a case (eg, for a free flap or a patient with significant morbidity)? | 62.5% | 37.5% | 70.0% | 30.0% | 65.0% | 35.0% |
| - <b>AVOID</b> a neck dissection or sentinel node biopsy in a radiologically N0 neck in a case of cutaneous melanoma?                                                                                               | 40.0% | 60.0% | 40.0% | 60.0% | 35.0% | 65.0% |
| -Do <b>sentinel node biopsy</b> instead of elective neck dissection for T1/2 oral cancer or melanoma?                                                                                                               | 42.5% | 57.5% | 50.0% | 50.0% | 45.0% | 55.0% |
| - <b>AVOID</b> a tracheostomy in an advanced T2/3 oral cancer requiring free flap?                                                                                                                                  | 35.0% | 65.0% | 32.5% | 67.5% | 25.0% | 75.0% |
| - <b>AVOID</b> primary free flap reconstruction and instead perform local or pedicled flap?                                                                                                                         | 62.5% | 37.5% | 70.0% | 30.0% | 72.5% | 27.5% |
| - <b>AVOID</b> a tracheostomy in an oropharyngeal cancer undergoing transoral surgery?                                                                                                                              | 70.0% | 30.0% | 87.5% | 12.5% |       |       |
| - <b>AVOID</b> primary free flap reconstruction and instead perform delayed reconstruction at a later date?                                                                                                         | 27.5% | 72.5% | 20.0% | 80.0% |       |       |
| - <b>AVOID</b> salvage surgery?                                                                                                                                                                                     | 30.0% | 70.0% | 12.5% | 87.5% |       |       |
| - <b>AVOID</b> a neck dissection or sentinel node biopsy in a radiologically N0 neck at risk of occult metastasis in a T1-2 oral or oropharyngeal cancer (eg, T2 N0 oral cancer with 7 mm depth)?                   | 25.0% | 75.0% | 15.0% | 85.0% |       |       |
| -Only experienced senior surgeons to operate on patients?                                                                                                                                                           | 62.5% | 37.5% | 80.0% | 20.0% |       |       |
| - <b>AVOID</b> a neck dissection or sentinel node biopsy in a radiologically N0 neck in a T3-4 cancer oral or oropharyngeal cancer?                                                                                 | 7.5%  | 92.5% |       |       |       |       |

**Q7. When surgery is delayed due to resource constraints from the COVID-19 pandemic:**

-Serial monitoring should be used to assess for tumour progression while awaiting definitive treatment?  
 -Evidence of tumour progression should prompt re-evaluation of treatment options and/or re-prioritisation?

| Yes    | No   |
|--------|------|
| 92.5%  | 7.5% |
| 100.0% | 0.0% |

**Q8. In a severely constrained setting:**

a. Would you change your indications for palliative care as the only treatment for a primary tumor?

| Yes   | No    | Yes   | No    |
|-------|-------|-------|-------|
| 45.0% | 55.0% | 47.5% | 52.5% |

b. What would be your indications for palliative care as the only treatment?

-Patients with low cure rate (eg, below 20% five year survival)?  
 -Patients with advanced biological age (eg, >85 years) who have advanced stage disease?  
 -Patients with poor functional status (e.g. spends >50% of the day in bed) or Performance Status 3?

| Yes   | No    | Yes   | No    |
|-------|-------|-------|-------|
| 55.0% | 45.0% | 60.0% | 40.0% |
| 77.5% | 22.5% | 92.5% | 7.5%  |
| 82.5% | 17.5% |       |       |

**PART 3**

**Patient prioritisation in the context of increased SARS-CoV-2 virus prevalence**

|                                                                                                                                 | 1st round                      | 2nd round                      | 3rd round |
|---------------------------------------------------------------------------------------------------------------------------------|--------------------------------|--------------------------------|-----------|
| <b>Q1. How would you prioritise the following cases in terms of timing of operations- ie which would you operate on first ?</b> |                                |                                |           |
|                                                                                                                                 | Rank (R1)                      | Rank (R2)                      | Rank (R2) |
|                                                                                                                                 | Average aggregated scores (R1) | Average aggregated scores (R2) |           |
| -T3 N2 oral cancer                                                                                                              | 1                              | 1                              | 1         |
| -T4 N1 laryngeal cancer                                                                                                         | 2                              | 2                              | 2         |
| -T4 N0 maxillary cancer                                                                                                         | 3                              | 3                              | 3         |
| -T4a N1 papillary thyroid cancer with tracheal invasion                                                                         | 4                              | 4                              | 4         |
| -T3 N1 carcinoma ex-pleomorphic parotid cancer                                                                                  | 5                              | 5                              | 5         |
| -T1/2 N0 oral cancer                                                                                                            | 6                              | 6                              | 6         |
| -T2 N1 oropharyngeal cancer p16(-)                                                                                              | 7                              | 7                              | 7         |
| -T2 N1 oropharyngeal cancer p16(+)                                                                                              | 8                              | 8                              | 8         |
| -T0 N1 unknown primary                                                                                                          | 9                              | 9                              | 9         |
| -T2 N0 adenoid cystic oral cavity                                                                                               | 10                             | 10                             | 10        |
| -T1 N0 laryngeal cancer                                                                                                         | 11                             | 11                             | 11        |
| -T2 N0 papillary thyroid cancer with a posterior nodule                                                                         | 12                             | 12                             | 12        |

**Q2. In the first round, these were the most commonly selected factors affecting prioritisation of surgery in the setting of the COVID-19 pandemic. Please rank these factors according to your current preferences**

-Chance of progression with delay (risk to patient)  
 -Patient COVID-19 status (risk to patients and staff)  
 -Prognosis (risk to patient)  
 -Availability of infrastructure to operate on COVID-19+ patients, including personal protective equipment and trained staff, etc. (risk to patients and staff)  
 -Effectiveness and availability of alternative treatments (risk to patient)  
 -Intensive care bed availability (resource utilisation)  
 -Severity of symptoms (patient experience)  
 -Risk of inadvertent SARS-CoV-2 transmission (risk to staff)  
 -Post-operative recovery time in hospital (resource utilisation)  
 -Duration of operation (resource utilisation)

| % chosen (R1) | Rank (R2) | Average aggregated scores (R2) |
|---------------|-----------|--------------------------------|
| 65.0          | 1         | 4.5                            |
| 62.5          | 2         | 3.9                            |
| 42.5          | 3         | 2.7                            |
| 42.5          | 4         | 2.3                            |
| 32.5          | 5         | 1.6                            |

FNE=flexible nasendoscopy. PPE=personal protective equipment. RT=radiotherapy
